# Supplementary material
Source: publisher figshare collection journal article supplement (https://gsapubs.figshare.com/ndownloader/files/23213105)
Supplement: Supplementary file 1 [file 23213105]

## Sheet: MPER
SUPPLEMENTARY INFORMATION 5 (SI5)
A Chronostratigraphic Framework for the Rise of the Ediacaran Macrobiota: New Constraints from Mistaken Point Ecological Reserve, Newfoundland
Jack Matthews (University of Oxford), Alexander Liu (University of Cambridge), Chuan Yang (British Geological Survey), Duncan McIlroy (Memorial University of Newfoundland), Bruce Levell (University of Oxford), and Daniel Condon (British Geological Survey)
Dataset of stratigraphic occurences of published Ediacaran macrofossils from Mistaken Point Ecological Reserve, Newfoundland
FOSSILIFEROUS SURFACES
Site/Surface	Formation (as described herein)	Metres from Base of Fm (see notes)	Metres through Section	Age of Surface in Age Model	95% C.I. of age model based on weighted mean 206Pb/238U dates (+)	95% C.I. of age model based on weighted mean 206Pb/238U dates (-)	Holdfast	Hiemalora	Trepassia wardae	Vinlandia antecedens	Charnia masoni	Beothukis mistakensis	Culmofrons plumosa	Avalofractus abaculus	Plumeropriscum hofmanni	String organism'	Frondophyllas grandis	Ostrich feather'	Pectinifrons abyssalis	Fractofusus misrai	Fractofusus andersoni	Primocandelabrum hiem.	Primocandelabrum sp.	Bradgatia sp.	Hapsidophyllas flexibilis	Charniodiscus procerus	Charniodiscus spinosus	Arborea arborea	Charniodiscus sp.	Thectardis avalonensis	Broccoliforma alta	Hadryniscala avalonica	Hadrynichorde catalinensis	Filaments	Ivesheadiomorphs
							1	2	3	4	5	6	7	8	9	10	11	12	13	14	15	16	17	18	19	20	21	22	23	24	25	26	27	28	29
CR2	Fermeuse	283	1893	562.568	N/A	N/A	1893
MP12 + 5m	Fermeuse	80	1690	563.38	N/A	N/A	1690
SH-2 TUFFITE SAMPLE	Fermeuse	75	1685	563.4	0.6	0.6
MP 12 (Shingle Head)	Fermeuse	75	1685	563.4	0.6	0.6	1685						1685						1685					1685		1685			1685						1685
MP20	Fermeuse	45	1655	563.5	0.6	0.6	1655																						1655					1655
Fermeuse/Trepassey boundary			1610	563.7	0.6	0.6
MP17	Trepassey	53	1423	564.6	0.4	0.4	1423	1423																											1423
LC-1 TUFFITE SAMPLE	Trepassey	43	1413	564.6	0.4	0.4
MP 9	Trepassey	43	1413	564.6	0.4	0.4	1413	1413			1413		1413			1413	1413		1413			1413	1413	1413	1413	1413	1413			1413	1413	1413			1413
MP13	Trepassey	31	1401	564.7	0.3	0.4	1401																						1401						1401
MP 8	Trepassey	15	1385	564.8	0.3	0.4	1385	1385			1385											1385						1385						1385	1385
MP North	Trepassey	7.5	1377.5	564.8	0.3	0.4	1377.5	1377.5			1377.5								1377.5			1377.5			1377.5	1377.5	1377.5	1377.5	1377.5	1377.5					1377.5
Trepassey/Mistaken Point boundary			1370	564.8	0.3	0.4
MP 4 + 1m	Mistaken Point	286	1366	564.8	0.3	0.4																							1366
MP 4	Mistaken Point	285	1365	564.8	0.3	0.4	1365
MP 4 - 1.4m	Mistaken Point	283.6	1363.6	564.8	0.3	0.4	1363.6	1363.6
MP 3	Mistaken Point	273.67	1353.67	564.9	0.3	0.4	1353.67																	1353.67	1353.67				1353.67
MP J +2m	Mistaken Point	272.67	1352.67	564.9	0.3	0.4	1352.67
MP 6	Mistaken Point	272.17	1352.17	564.9	0.3	0.4	1352.17	1352.17											1352.17				1352.17	1352.17			1352.17							1352.17
MP18	Mistaken Point	272	1352	564.9	0.3	0.4	1352			1352									1352				1352			1352			1352			1352		1352	1352
MP3 - 2.5m	Mistaken Point	271.17	1351.17	564.9	0.2	0.3	1351.17																												1351.17
MP J	Mistaken Point	270.67	1350.67	564.9	0.2	0.3		1350.67			1350.67												1350.67	1350.67			1350.67
MP 10 (MP I)	Mistaken Point	268.55	1348.55	564.9	0.2	0.3	1348.55				1348.55									1348.55			1348.55	1348.55					1348.55						1348.55
MP15	Mistaken Point	267	1347	564.9	0.2	0.3	1347	1347			1347									1347	1347								1347						1347
MP 7	Mistaken Point	267	1347	564.9	0.2	0.3	1347				1347		1347					1347					1347	1347		1347								1347	1347
MP16	Mistaken Point	262	1342	564.9	0.2	0.3	1342	1342			1342								1342				1342	1342		1342		1342		1342					1342
MP H	Mistaken Point	260.58	1340.58	564.9	0.2	0.3						1340.58											1340.58	1340.58		1340.58
MP G	Mistaken Point	244.8	1324.8	565	0.2	0.3	1324.8		1324.8		1324.8		1324.8		1324.8	1324.8	1324.8			1324.8			1324.8	1324.8		1324.8	1324.8		1324.8				1324.8		1324.8
MP G (WC) -10cm	Mistaken Point	244.7	1324.7	565	0.2	0.2	1324.7
MP2 F +1.1m	Mistaken Point	237.88	1317.88	565	0.2	0.2		1317.88																	1317.88
MP2 F	Mistaken Point	236.78	1316.78	565	0.2	0.2	1316.78
MP-14 TUFFITE SAMPLE	Mistaken Point	235	1315	565	0.2	0.2
MP E	Mistaken Point	235	1315	565	0.2	0.2	1315	1315			1315	1315	1315	1315	1315			1315	1315	1315	1315		1315	1315	1315	1315	1315			1315	1315	1315			1315
WC Between D and E	Mistaken Point	234.28	1314.28	565	0.2	0.2	1314.28													1314.28
CR1 D + 1m	Mistaken Point	233.56	1313.56	565	0.2	0.2															1313.56														1313.56
MP D	Mistaken Point	232.56	1312.56	565	0.2	0.2	1312.56				1312.56	1312.56			1312.56				1312.56	1312.56			1312.56	1312.56	1312.56	1312.56			1312.56					1312.56	1312.56
MP2 D -2m (28.5m level in Landing et al log)	Mistaken Point	230.56	1310.56	565.1	0.2	0.2	1310.56
MP C-D	Mistaken Point	223.055	1303.06	565.1	0.3	0.2	1303.06	1303.06				1303.06							1303.06																1303.06
MP C	Mistaken Point	213.55	1293.55	565.2	0.4	0.3	1293.55				1293.55								1293.55				1293.55			1293.55									1293.55
MP B	Mistaken Point	212.81	1292.81	565.2	0.4	0.3	1292.81												1292.81				1292.81		1292.81	1292.81									1292.81
MP B - 55cm	Mistaken Point	209.81	1289.81	565.2	0.4	0.3																			1289.81
LMP + 1 m	Mistaken Point	56	1136	566.2	0.7	0.7	1136																						1136
LMP	Mistaken Point	55	1135	566.2	0.7	0.7	1135	1135	1135	1135	1135	1135	1135		1135		1135	1135			1135		1135				1135	1135						1135	1135
Mistaken Point/Briscal boundary			1080	566.5	0.7	0.7
CR4	Briscal	296	1066	566.6	0.7	0.7	1066
BR9	Briscal	255	1025	566.9	0.7	0.7	1025	1025
SWIM	Briscal	250	1020	566.9	0.7	0.7	1020																											1020	1020
BR2	Briscal	224	994	567.1	0.6	0.7	994	994									994		994		994														994
BC+3m	Briscal	213	983	567.1	0.6	0.7											983
BR3 + 16cm	Briscal	210.16	980.16	567.2	0.6	0.7															980.16
Bristy C (X-ray)	Briscal	210	980	567.2	0.6	0.7	980			980	980		980								980			980											980
BR3	Briscal	210	980	567.2	0.6	0.7	980																											980
BR3 - 1.5m	Briscal	208.5	978.5	567.2	0.6	0.7	978.5
PCS2 + 3m	Briscal	205	975	567.2	0.6	0.7	975
PCS2	Briscal	202	972	567.2	0.6	0.7					972																	972	972
BR4a	Briscal	178.5	948.5	567.4	0.5	0.6	948.5
BR4b	Briscal	178.5	948.5	567.4	0.5	0.6	948.5
BR4c	Briscal	178.5	948.5	567.4	0.5	0.6	948.5
BR5 + 6m	Briscal	116	886	567.8	0.3	0.3	886														886								886
BRS-1 TUFFITE SAMPLE	Briscal	110	880	567.8	0.3	0.3
BR5	Briscal	110	880	567.8	0.3	0.3	880	880	880		880	880	880			880					880		880			880		880		880		880		880	880
BR5 - 60 cm	Briscal	109.4	879.4	567.8	0.3	0.3	879.4														879.4
BR5 - 2.6m	Briscal	107.4	877.4	567.9	0.4	0.3	877.4				877.4									877.4
BR5 - 9.6m (arches_	Briscal	100.4	870.4	568.2	0.7	0.5	870.4				870.4		870.4										870.4						870.4						870.4
BR5 - 10.2 m	Briscal	99.8	869.8	568.2	0.7	0.5	869.8																											869.8
BR6	Briscal	34	804	570.8	0.5	0.7					804									804	804			804					804
DRK1T	Briscal	33	803	570.9	0.5	0.7			803																										803
BR6 - 5.7m	Briscal	28.3	798.3	571.1	0.4	0.6	798.3
BR6 - 7m	Briscal	27	797	571.1	0.4	0.6															797								797
BR7 + 2m	Briscal	27	797	571.1	0.4	0.6	797
BR7	Briscal	25	795	571.2	0.3	0.5						795									795		795												795
CW 1	Briscal	22	792	571.3	0.2	0.4			792
DRK-1 TUFFITE SAMPLE	Briscal	20	790	571.4	0.2	0.2
Briscal/Drook boundary			770	572.6	0.8	0.8
BR8	Drook	763	763	573.1	0.7	0.8	763	763
DRK2PC + 1m	Drook	748	748	574	0.3	0.4	748																												748
DRK-10 TUFFITE SAMPLE	Drook	747	747	574	0.2	0.2
DRK2PC	Drook	747	747	574	0.2	0.2	747		747		747																		747	747				747	747
DRK2PC - 31cm	Drook	746.69	746.69	574	0.2	0.2																													746.69
DRK2PC -3m	Drook	744	744	574	0.3	0.2																													744
CANT + 70cm	Drook	711.7	711.7	574.3	0.6	0.4				711.7
CANT	Drook	711	711	574.3	0.6	0.4				711																				711					711
CANT -11m	Drook	700	700	574.4	0.6	0.5			700
CANT -17m	Drook	694	694	574.4	0.6	0.5			694																										694
DRK3CW	Drook	691	691	574.5	0.7	0.5			691																										691
DRK 4	Drook	623	623	575	0.9	0.7																													623
NOTES
Taxon Range:	The presence of a taxon on a particular surface is indicated by the stratigraphic position of that surface, expressed in the appropriate taxon column
Age Model - Ages in Red:	N.B. Ages in red have been extrapolated outside the range of the original age model
Age Model - Ages in Orange:	N.B Ages in orange have been calculated using a stratigraphic and chronological constraint from outside this study, from the Gaskiers Fm
Metres from Base of Fm:	As the base of the Drook Formation is not exposed in MPER, all measurements for this Fm are taken from the lowest horizon within the Reserve
Metres through Section:	The stratigraphic position of surfaces was calculated from a mixture of the use of geological cross-sections, and measured stratigraphic sections. In large parts of MPER, the succession cannot be directly logged due to access issues
Formation Boundaries	These are highlighted in yellow
Position of Sampled Tuffites	These are highlighted in Green (Note that the age model age is provided, not that yielded from the individual sample analyses themselves)
Fossil Identification	All taxonomic occurences in this dataset are based on fossil identification by AGL, for consistency of interpretation
